# Supplementary material
Source: PubMed Central journal article supplement (PMC9574749)
Supplement: EMBJ-41-e111631-s004.pdf [file EMBJ-41-e111631-s004.pdf]

# Appendix

## **Actin network architecture can ensure robust centering or sensitive decentering of the centrosome**

Shohei Yamamoto, Jérémie Gaillard, Benoit Vianay, Christophe Guerin, Magali Orhant-Prioux, Laurent Blanchoin, Manuel Théry

### **Table of Contents**

1. Appendix Fig. S1
2. Appendix Fig. S2
3. Appendix Fig. S3
4. Appendix Table S1

## Appendix Fig. S1

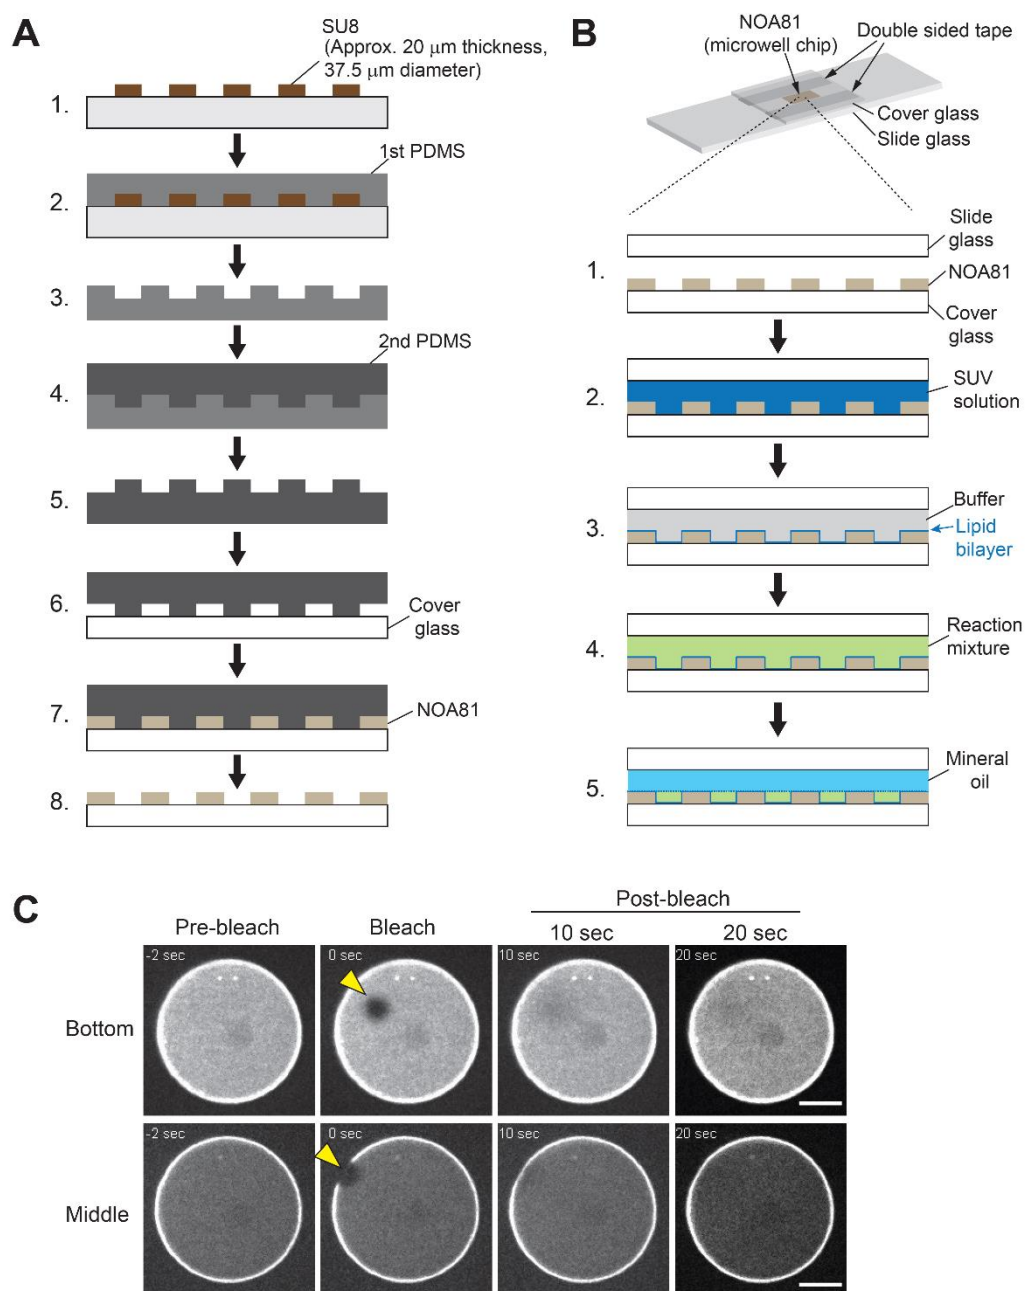

### Appendix Fig. S1. Preparation of microwells and samples.

(A) Scheme of construction of NOA81-based microwells on a cover glass (See also Methods). SU8 mold was made on the wafer and silanized. The mold was used to make 1<sup>st</sup> PDMS mold. The 1<sup>st</sup> PDMS was silanized and then used to make 2<sup>nd</sup> PDMS. The 2<sup>nd</sup> PDMS was cut to small pieces and used as PDMS stamps. The PDMS stamp was placed on a cleaned cover glass. The space between pillars were filled with NOA81. By UV exposure, NOA81 was cured. The PDMS stamp and the excess NOA81 were removed. (B) Scheme of sample preparation (See also Methods). The NOA81-attached cover glass was exposed to plasma. After plasma treatment, the NOA81-attached cover glass was attached onto a

silane-PEG coated slide glass with double-sided tapes. Then, the SUV solution was loaded into the chamber and incubated to make a supported lipid bilayer on the surface of microwells. The excess SUVs were then removed from the chamber by perfusing with buffer solution. After washing, the chamber was filled with the reaction mixture containing tubulin and actin. Then, the microwells were immediately closed with mineral oil. (C) Photo-bleaching of lipids on microwell (Bottom or middle edge of the well). Fluorescently labelled lipids were photo-bleached (shown with yellow arrow head). Fluorescent recovery indicates diffusion of lipids. Scale bar 10  $\mu\text{m}$ .

## Appendix Fig. S2

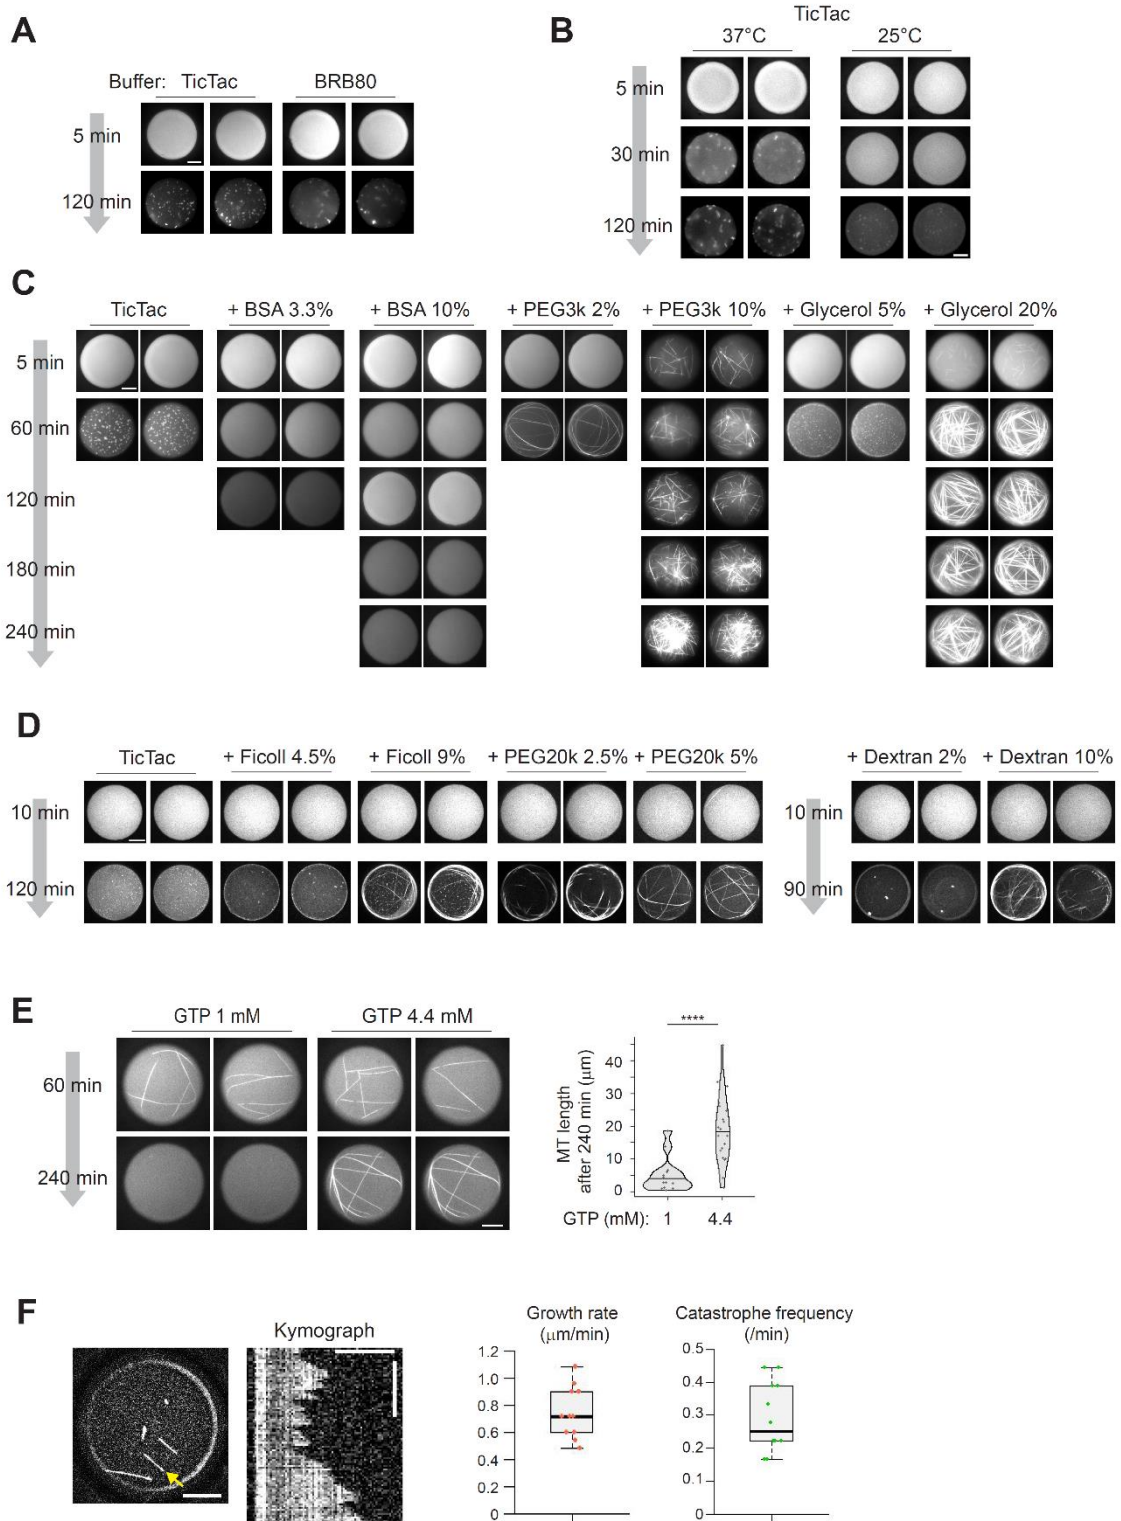

### Appendix Fig. S2. Screening of biochemical conditions to slow down tubulin precipitation.

(A) Comparison of two different buffer solutions. Images show fluorescently labeled tubulin in microwells. Samples were incubated at 37°C after sample preparation. Tubulin 15  $\mu\text{M}$ . Tubulin precipitation occurred both in the BRB80 and the TicTac buffer. (B) Comparison of two different

temperatures in the TicTac buffer. Images show fluorescently labeled tubulin in microwells. After sample preparation, samples were incubated at the indicated temperatures. Tubulin 20  $\mu\text{M}$ . Incubation at lower temperature was better to slow down tubulin precipitation, although even at the lower temperature, tubulin precipitation occurred before 2 hours after sample preparation. **(C, D)** Test of various crowding reagents. Indicated reagents were added in the TicTac buffer. Images show fluorescently labeled tubulin in microwells. Samples were incubated at 25°C. Tubulin 12.5  $\mu\text{M}$ . High concentration of BSA slowed down tubulin precipitation. Some of the crowding reagents (e.g. PEG) induced MT nucleation. The addition of PEG also induced tubulin aggregation, which resulted in the formation of aster-like structures. **(E)** Comparison of GTP concentrations. MT formation was induced by adding GMPCPP-stabilized MT seeds. Tubulin 8  $\mu\text{M}$ . (GTP 1 mM n= 13, GTP 4.4 mM n = 20 MTs). Violin plots were shown with the median (horizontal line). \*\*\*\*p<0.0001 (Mann-Whitney U test). In this experiment, 15% BSA was added in the TicTac buffer. Addition of higher concentration of GTP maintained MTs for a long time. **(F)** MT dynamics in lipid coated microwells. Kymograph of the MT indicated by a yellow arrow was shown. GMPCPP-stabilized MT seeds were added to induce MT formation. Tubulin 16  $\mu\text{M}$ . TicTac buffer supplemented with 5% BSA, 4.4 mM GTP, 2.7 mM ATP, 10 mM DTT, 20  $\mu\text{g}/\text{mL}$  catalase, 3 mg/mL glucose, 100  $\mu\text{g}/\text{mL}$  glucose oxidase. Samples were incubated at 22°C. Background subtraction was performed to increase signal-to-noise ratio. Scale bar 10  $\mu\text{m}$  in larger image and 5  $\mu\text{m}$  in kymograph, Time scale bar indicates 10 min in kymograph. n = 12 MTs; 2 independent experiments. Plots show box (25 to 75%) and whisker (10 to 90%). Lines in the box indicate medians. Data information: **(A)-(E)** Images of wells were randomly taken at each time point, indicating that the represented wells were not identical through time points. In these experiments, microwells were coated with Silane-PEG30k. As a basic buffer solution (control), BRB80 or TicTac buffer supplemented with 0.1% BSA, 1 mM GTP, 2.7 mM ATP, 20 mM DTT, 20  $\mu\text{g}/\text{mL}$  catalase, 3 mg/mL glucose, 100  $\mu\text{g}/\text{mL}$  glucose oxidase was used. Scale bar 10  $\mu\text{m}$ .

## Appendix Fig. S3

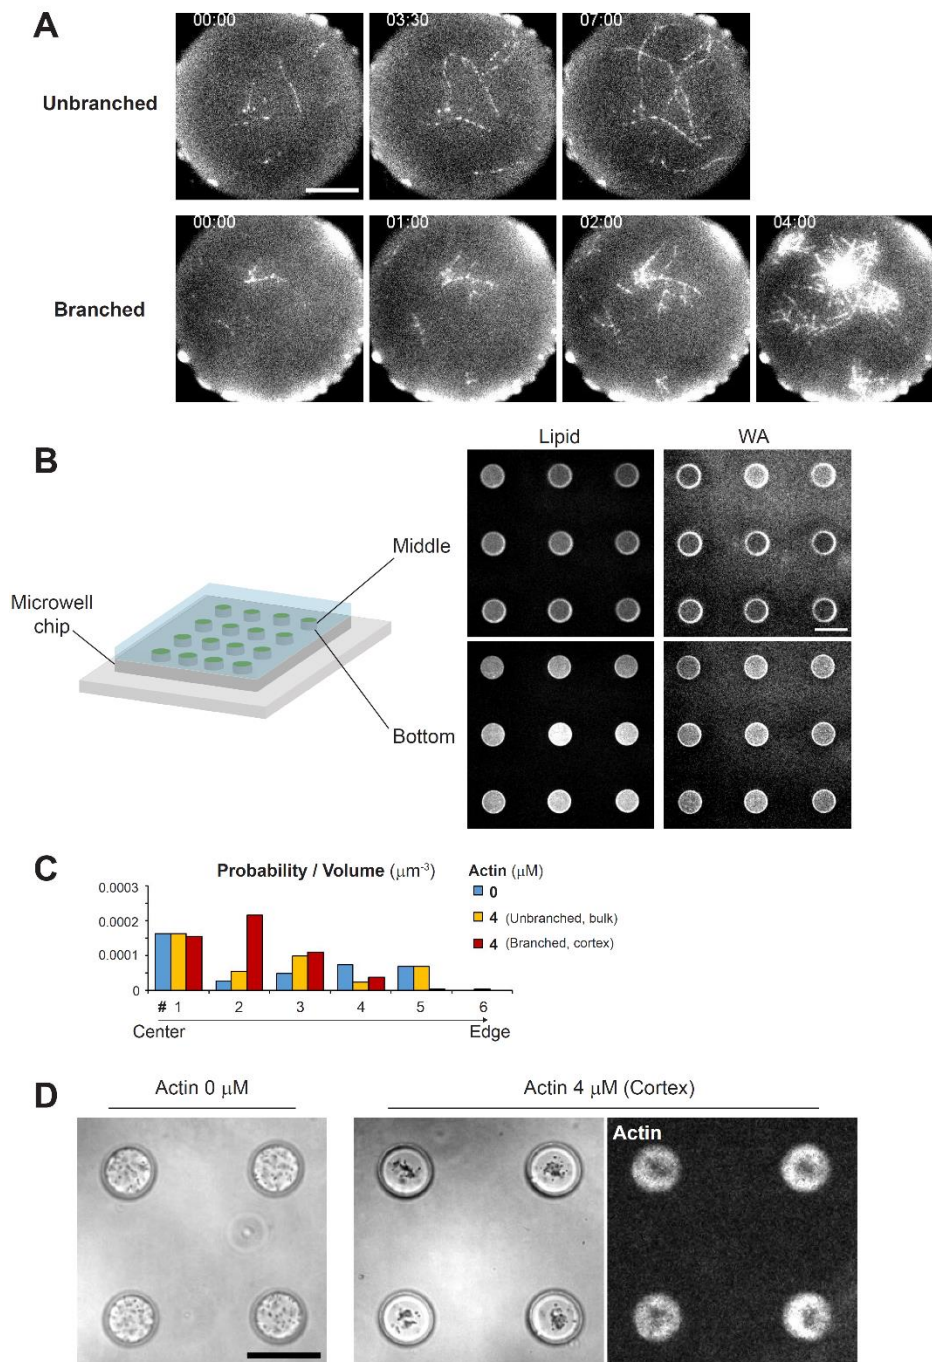

### Appendix Fig. S3. Characterization of actin assembly in microwells.

(A) Time-lapse imaging of actin assembly on lipid coated microwells by TIRF microscope. Top images show unbranched actin (Actin 1.25  $\mu\text{M}$ ). Bottom images show branched actin (Actin 1.25  $\mu\text{M}$ , Arp2/3 complex 80 nM, GST-WA 100 nM). In these experiments, 0.25% of methyl cellulose (Sigma, 1500 cP) was added to visualize actin filaments within the TIRF field. Time indicates (min:sec). Scale bar 10  $\mu\text{m}$ . (B) Lipid and NPF (WA) coated microwells. Fluorescence labelled lipid and snap-streptavidin-WA were used. Scale bar 50  $\mu\text{m}$ . (C) Distribution of the aMTOC in the absence of free tubulin in

microwells. Probability per volume was calculated as shown in Figure EV2A. Data shown in Figure 2E were used. **(D)** Distribution of smaller beads (1  $\mu\text{m}$  in diameter, PolySciences, #08226) in the absence or presence of cortical actin (Actin 4  $\mu\text{M}$ , Arp2/3 80 nM and NPF coating) in microwells. In bright field images, black dots in microwells indicate the beads. The presence of cortical actin clustered the beads to the well center. Scale bar, 50  $\mu\text{m}$ .

## Appendix Table S1

### Cytosim parameters

|             |                                   | Value                         | Note                                                                                   |
|-------------|-----------------------------------|-------------------------------|----------------------------------------------------------------------------------------|
| Global      | Time step                         | 0.01 s                        | Computational parameter                                                                |
|             | Viscosity                         | 0.3 pN<br>s/ $\mu\text{m}^2$  | (Ref S1)                                                                               |
|             | Steric force constant (Repulsion) | 1.5 pN/ $\mu\text{m}$         | Adapted from the range in previous studies (Ref S2, S3)                                |
| Cell        | Radius                            | 10 $\mu\text{m}$              | Radius for the basic circular geometry (Ref S4)                                        |
|             | Confinement stiffness             | 500 pN/ $\mu\text{m}$         | Confinement strength of microtubules and actin filaments inside the cell (Ref S4)      |
| Microtubule | Rigidity                          | 25 pN<br>$\mu\text{m}^2$      | Persistence length $L_p = 5200 \mu\text{m}$ (Ref S4, S5)                               |
|             | Segmentation                      | 0.2 $\mu\text{m}$             | Computational parameter                                                                |
|             | Steric radius                     | 50 nm                         | (Ref S2, S3)                                                                           |
|             | Growing speed                     | Varied                        | (Ref S4, S6)                                                                           |
|             | Stall force                       | 1.67 pN                       | Growing sensitivity to force (Ref S7, S8)                                              |
|             | Shrinking speed                   | 0.27 $\mu\text{m/s}$          | (Ref S4, S6)                                                                           |
|             | Catastrophe rate                  | 0.01, 0.04<br>$\text{s}^{-1}$ | Unloaded and stalled catastrophe rate (Ref S4, S9)                                     |
|             | Rescue rate                       | 0.064 $\text{s}^{-1}$         | (Ref S4, S6)                                                                           |
|             | Initial length                    | 1 $\mu\text{m}$               | Length of microtubules at $t=0$ sec                                                    |
| MTOC        | Radius                            | 0.5 $\mu\text{m}$             | Radius of MTOC (Ref S4)                                                                |
|             | First anchoring stiffness         | 500 pN/ $\mu\text{m}$         | Stiffness of the link anchoring microtubules to the center of MTOC (Ref S4)            |
|             | Second anchoring stiffness        | 500 pN/ $\mu\text{m}$         | Stiffness of the link anchoring microtubules to a point on the MTOC periphery (Ref S4) |
| Actin       | Rigidity                          | 0.06 pN<br>$\mu\text{m}^2$    | Persistence length $L_p = 15 \mu\text{m}$ was chosen. (Ref S2, S10)                    |
|             | Segmentation                      | 0.2 $\mu\text{m}$             | Computational parameter                                                                |
|             | Steric radius                     | 50 nm                         | (Ref S2, S3)                                                                           |

Bulk actin  
network



|       |        |                 |                           |
|-------|--------|-----------------|---------------------------|
| Actin | Number | Varied          | Number of actin filaments |
|       | Length | 5 $\mu\text{m}$ | Length of actin filaments |

Actin near cell  
periphery

|                         |                           |                                             |                                                                              |
|-------------------------|---------------------------|---------------------------------------------|------------------------------------------------------------------------------|
| Actin nucleation factor | Nucleation rate           | 100 $\text{s}^{-1}$                         | Rate of nucleation, High enough for quick actin assembly                     |
|                         | Length of actin filaments | 2 $\mu\text{m}$                             |                                                                              |
|                         | Unbinding rate            | 0 $\text{s}^{-1}$                           | No detachment                                                                |
|                         | Stiffness                 | 100 $\text{pN}/\mu\text{m}$                 | Stiffness of the link between the nucleator and its fixed anchoring position |
|                         | Number                    | Varied                                      | Number of actin nucleation factor                                            |
| Actin branching factor  | Nucleation rate           | 100 $\text{s}^{-1}$                         | Nucleation rate when bound to an existing filament, for quick actin assembly |
|                         | Length of actin filaments | 1 $\mu\text{m}$                             |                                                                              |
|                         | Binding rate              | 1 $\text{s}^{-1}$                           | Binding rate for quick actin assembly                                        |
|                         | Binding range             | 0.01 $\mu\text{m}$                          | Bind to a close filament                                                     |
|                         | Unbinding rate            | 0 $\text{s}^{-1}$                           | No detachment                                                                |
|                         | Equilibrium angle         | 1.22 rad                                    | Angle between the two branches, 70° (Ref S11)                                |
|                         | Angular stiffness         | 0.13 $\text{pN}\cdot\mu\text{m}/\text{rad}$ | Stiffness of the torque connecting the two branches (Ref S2, S11)            |
|                         | Diffusion                 | 0 $\mu\text{m}^2/\text{s}$                  | No diffusion, in order to limit the region of actin assembly                 |
|                         | Number                    | Varied                                      | Number of actin branching factor                                             |

### Varying parameters

|             |                        | Value | Figures                            | Note                              |
|-------------|------------------------|-------|------------------------------------|-----------------------------------|
| Microtubule | Number of microtubules | 90    | Except for Fig.EV3F, EV4G and EV5I | Number of microtubules at t=0 sec |
|             |                        | 30    | Fig.EV3F, EV4G and EV5I            |                                   |

|                         |               |                      |                                                 |                                      |
|-------------------------|---------------|----------------------|-------------------------------------------------|--------------------------------------|
|                         | Growing speed | 0.07 $\mu\text{m/s}$ | Fig.3E-G<br>Fig.EV3D-F                          | Aster with shorter MTs               |
|                         |               | 0.13 $\mu\text{m/s}$ | Fig.4K-M, 5K-M<br>Fig.EV4F, G, J and<br>EV5H, I | (Ref S4, S6)                         |
| Actin (Bulk actin)      | Number        | 800                  | Fig.3E-G,<br>Fig.EV3D, F                        | Dense actin filaments (Bulk)         |
|                         |               | 80                   | Fig.EV3E                                        | Loose actin filaments (Bulk)         |
| Actin nucleation factor | Number        | 1400                 | Fig.4K-M<br>Fig.EV4F, G                         | Symmetric actin network (periphery)  |
|                         |               | 905                  | Fig.5K-M, Fig.EV5H, I                           | Asymmetric actin network (periphery) |
|                         |               | 100                  | Fig.EV4J                                        | Loose actin network (Periphery)      |
| Actin branching factor  | Number        | 2100                 | Fig.4K-M<br>Fig.EV4F, G                         | Symmetric actin network (periphery)  |
|                         |               | 365                  | Fig.5K-M, Fig.EV5H, I                           | Asymmetric actin network (periphery) |
|                         |               | 100                  | Fig.EV4J                                        | Loose actin network (Periphery)      |

## References in Appendix Table S1

- S1. Polyakov, O. Y. (2013). Mechanical Aspects of Drosophila Gastrulation. Princeton University
- S2. Letort, G., Politi, A. Z., Ennomani, H., Théry, M., Nédélec, F., & Blanchoin, L. (2015). Geometrical and Mechanical Properties Control Actin Filament Organization. *PLOS Computational Biology*, 11(5), e1004245. <https://doi.org/10.1371/JOURNAL.PCBI.1004245>
- S3. Rickman, J., Nédélec, F., & Surrey, T. (2019). Effects of spatial dimensionality and steric interactions on microtubule-motor self-organization. *Physical Biology*, 16(4), 046004. <https://doi.org/10.1088/1478-3975/ab0fb1>
- S4. Letort, G., Nédélec, F., Blanchoin, L., & Théry, M. (2016). Centrosome centering and decentering by microtubule network rearrangement. *Molecular Biology of the Cell*, 27(18), 2833–2843. <https://doi.org/10.1091/mbc.E16-06-0395>

- S5. Gittes, F., Mickey, B., Nettleton, J., & Howard, J. (1993). Flexural rigidity of microtubules and actin filaments measured from thermal fluctuations in shape. *Journal of Cell Biology*, *120*(4), 923–934. <https://doi.org/10.1083/jcb.120.4.923>
- S6. Burakov, A., Nadezhkina, E., Slepchenko, B., & Rodionov, V. (2003). Centrosome positioning in interphase cells. *Journal of Cell Biology*, *162*(6), 963–969. <https://doi.org/10.1083/jcb.200305082>
- S7. Dogterom, M., & Yurke, B. (1997). Measurement of the force-velocity relation for growing microtubules. *Science*, *278*(5339), 856–860. <https://doi.org/10.1126/SCIENCE.278.5339.856>
- S8. Kozlowski, C., Srayko, M., & Nedelec, F. (2007). Cortical Microtubule Contacts Position the Spindle in *C. elegans* Embryos. *Cell*, *129*(3), 499–510. <https://doi.org/10.1016/j.cell.2007.03.027>
- S9. Janson, M. E., De Dood, M. E., & Dogterom, M. (2003). Dynamic instability of microtubules is regulated by force. *Journal of Cell Biology*, *161*(6), 1029–1034. <https://doi.org/10.1083/jcb.200301147>
- S10. Isambert, H., Venier, P., Maggs, A. C., Fattoum, A., Kassab, R., Pantaloni, D., & Carlier, M. F. (1995). Flexibility of Actin Filaments Derived from Thermal Fluctuations. Effect of bound nucleotide, phalloidin, and muscle regulatory proteins. *Journal of Biological Chemistry*, *270*(19), 11437–11444. <https://doi.org/10.1074/JBC.270.19.11437>
- S11. Blancholn, L., Amann, K. J., Higgs, H. N., Marchand, J. B., Kaiser, D. A., & Pollard, T. D. (2000). Direct observation of dendritic actin filament networks nucleated by Arp2/3 complex and WASP/Scar proteins. *Nature*, *404*(6781), 1007–1011. <https://doi.org/10.1038/35010008>
